# Supplementary material for: Advantages and disadvantages of vacuum-deposited and spin-coated amorphous organic semiconductor films for organic light-emitting diodes
Source: Royal Society of Chemistry journal article supplement (doi:10.1039/c5tc01911g), 2015-01-01
Supplement: c5tc01911g1.pdf [file c5tc01911g1.pdf]

## *Supplementary Information*

# **Advantages and disadvantages of vacuum-deposited and spin-coated amorphous organic semiconductor films for organic light-emitting diodes**

Maki Shibata,<sup>a</sup> Yoshiya Sakai<sup>b</sup> and Daisuke Yokoyama<sup>\*abc</sup>

<sup>a</sup> Department of Organic Device Engineering, Yamagata University, 4-3-16 Jonan, Yonezawa, Yamagata 992-8510, Japan.

<sup>b</sup> Department of Polymer Science and Engineering, Yamagata University, 4-3-16 Jonan, Yonezawa, Yamagata 992-8510, Japan.

<sup>c</sup> Research Center for Organic Electronics (ROEL), Yamagata University, 4-3-16 Jonan, Yonezawa, Yamagata 992-8510, Japan

E-mail: d\_yokoyama@yz.yamagata-u.ac.jp; Fax & Tel: +81-238-26-3890

### *List of table and figures*

| Table/Fig.      | Page |
|-----------------|------|
| <b>Table S1</b> | 2, 3 |
| <b>Fig. S1</b>  | 4, 5 |
| <b>Fig. S2</b>  | 6    |
| <b>Fig. S3</b>  | 7    |
| <b>Fig. S4</b>  | 8    |
| <b>Fig. S5</b>  | 9    |
| <b>Fig. S6</b>  | 9    |
| <b>Fig. S7</b>  | 10   |
| <b>Fig. S8</b>  | 11   |
| <b>Fig. S9</b>  | 12   |
| <b>Fig. S10</b> | 13   |
| <b>Fig. S11</b> | 14   |
| <b>Fig. S12</b> | 15   |
| <b>Fig. S13</b> | 16   |
| <b>Fig. S14</b> | 17   |
| <b>Fig. S15</b> | 17   |
| <b>Fig. S16</b> | 18   |
| <b>Fig. S17</b> | 18   |
| <b>Fig. S18</b> | 19   |
| <b>Fig. S19</b> | 19   |

**Table S1** Experimental conditions used for film fabrication and thicknesses of the film samples in each figure. All of the vacuum-deposited films were fabricated at a deposition rate of  $2 \text{ \AA s}^{-1}$  except in Figs. 16, 17, S16, and S17.

| Fig.   | Material           | Vac. <sup>o</sup> /Solvent        | Solution concentration<br>(mg ml <sup>-1</sup> ) | Spin speed (rpm) | Thickness (nm)    | Annealing temperature<br>for transition (°C) <sup>b</sup> |
|--------|--------------------|-----------------------------------|--------------------------------------------------|------------------|-------------------|-----------------------------------------------------------|
| 3      | TPD                | vac.                              | –                                                | –                | 51.8–204.5, 330.0 | –                                                         |
| 4      | TPD                | chloroform                        | 2–15                                             | 1000–5000        | 6.7–107.1         | –                                                         |
| 6      | TPD                | vac.                              | –                                                | –                | 52.3              | –                                                         |
|        |                    | chloroform                        | 15                                               | 4000             | 49.6              | –                                                         |
|        |                    | toluene                           | 15                                               | 2000             | 51.1              | –                                                         |
|        |                    | chlorobenzene                     | 15                                               | 1000             | 53.8              | –                                                         |
|        |                    | <i>o</i> -dichlorobenzene         | 40                                               | 2000             | 56.3              | –                                                         |
| 7, 8   | TPD                | vac.                              | –                                                | –                | 71.5              | 100                                                       |
|        |                    | chloroform                        | 10                                               | 1000             | 66.0              | 100                                                       |
| 9      | TPD                | vac.                              | –                                                | –                | 47.0              | 100                                                       |
|        |                    | chloroform                        | 10                                               | 2000             | 49.1              | –                                                         |
| 10, 15 | 2-TNATA            | vac.                              | –                                                | –                | 101.2             | 130                                                       |
|        |                    | chloroform                        | 15                                               | 1000             | 103.8             | 130                                                       |
| 11     | 2-TNATA            | vac.                              | –                                                | –                | 101.2             | 130                                                       |
|        |                    | chloroform                        | 15                                               | 1000             | 103.8             | –                                                         |
| 12     | 2-TNATA            | vac.                              | –                                                | –                | 46.5              | 130                                                       |
|        |                    | chloroform                        | 10                                               | 2000             | 47.8              | –                                                         |
| 13     | 2-TNATA            | chloroform                        | 10–20                                            | 1000–7000        | 30.7–150.0        | –                                                         |
| 14     | 2-TNATA            | vac.                              | –                                                | –                | 101.3             | 130                                                       |
|        |                    | chloroform                        | 15                                               | 1000–7000        | 48.1–115.6        | 130                                                       |
|        |                    | vac. ( $0.2 \text{ \AA s}^{-1}$ ) | –                                                | –                | 106.3             | 150                                                       |
| 16, 17 | 2-TNATA            | vac. ( $2 \text{ \AA s}^{-1}$ )   | –                                                | –                | 100.8             | 150                                                       |
|        |                    | vac. ( $20 \text{ \AA s}^{-1}$ )  | –                                                | –                | 112.8             | 150                                                       |
|        |                    | chlorobenzene                     | 30                                               | 1000             | 105.8             | –                                                         |
| 18     | TPD                | chlorobenzene                     | 30                                               | 1000             | 102.4             | –                                                         |
|        | TPT1               | chlorobenzene                     | 30                                               | 1000             | 108.4             | –                                                         |
|        | Poly-TPD           | chlorobenzene                     | 30                                               | 1000             | 99.5              | –                                                         |
|        | TPD                | chlorobenzene                     | 30                                               | 1000             | 106.7             | –                                                         |
|        | TPT1               | chlorobenzene                     | 30                                               | 1000             | 104.7             | –                                                         |
| 19     | Poly-TPD           | chlorobenzene                     | 30                                               | 1000             | 104.7             | –                                                         |
|        | TPD                | chlorobenzene                     | 30                                               | 1000             | 104.7             | –                                                         |
|        | TPT1               | chlorobenzene                     | 30                                               | 1000             | 104.7             | –                                                         |
|        | Poly-TPD           | chlorobenzene                     | 30                                               | 1000             | 104.7             | –                                                         |
|        | TPD                | chlorobenzene                     | 30                                               | 1000             | 104.7             | –                                                         |
| S1     | TPD                | vac.                              | –                                                | –                | 51.8–204.5        | –                                                         |
|        | $\alpha$ -NPD      | vac.                              | –                                                | –                | 51.7–201.2        | –                                                         |
|        | CBP                | vac.                              | –                                                | –                | 48.7–186.9        | –                                                         |
|        | Alq <sub>3</sub>   | vac.                              | –                                                | –                | 51.7–201.2        | –                                                         |
|        | $\alpha$ -ONPD     | vac.                              | –                                                | –                | 51.9–146.1        | –                                                         |
|        | 2-TNATA            | vac.                              | –                                                | –                | 47.8–192.8        | –                                                         |
|        | TPT1               | vac.                              | –                                                | –                | 52.4–159.4        | –                                                         |
|        | TSBF               | vac.                              | –                                                | –                | 49.2–149.8        | –                                                         |
|        | BDAVB <sub>i</sub> | vac.                              | –                                                | –                | 50.6–140.6        | –                                                         |
|        | TPD                | vac.                              | –                                                | –                | 330.0             | –                                                         |
| S2     | $\alpha$ -NPD      | vac.                              | –                                                | –                | 305.5             | –                                                         |
|        | CBP                | vac.                              | –                                                | –                | 300.1             | –                                                         |
|        | Alq <sub>3</sub>   | vac.                              | –                                                | –                | 273.9             | –                                                         |
|        | TPD                | vac.                              | –                                                | –                | 330.0             | –                                                         |
| S3     | $\alpha$ -NPD      | chloroform                        | 2–15                                             | 1000–5000        | 6.1–100.0         | –                                                         |
|        | CBP                | chloroform                        | 2–15                                             | 1000–5000        | 6.4–100.0         | –                                                         |
|        | Alq <sub>3</sub>   | chloroform                        | 2–15                                             | 1000–5000        | 8.0–99.8          | –                                                         |
|        | 2-TNATA            | chloroform                        | 10–20                                            | 1000–7000        | 30.7–150.0        | –                                                         |
|        | TPT1               | chloroform                        | 10–20                                            | 1000–7000        | 27.7–148.0        | –                                                         |
| S4     | TPD                | toluene                           | 2–15                                             | 1000–5000        | 9.3–68.7          | –                                                         |
|        |                    | chlorobenzene                     | 2–15                                             | 1000–5000        | 7.4–51.0          | –                                                         |
|        |                    | <i>o</i> -dichlorobenzene         | 20–40                                            | 1000–5000        | 18.1–80.0         | –                                                         |

(Continued on next page)

(Continued from the previous page)

| Fig.    | Material | Vac. <sup>a</sup> /Solvent    | Solution concentration<br>(mg ml <sup>-1</sup> ) | Spin speed (rpm) | Thickness (nm) | Annealing temperature<br>for transition (°C) <sup>b</sup> |
|---------|----------|-------------------------------|--------------------------------------------------|------------------|----------------|-----------------------------------------------------------|
| S5      | TPD      | vac.                          | –                                                | –                | 52.3, 102.2    | –                                                         |
| S6      | α-NPD    | vac.                          | –                                                | –                | 17.6           | –                                                         |
|         |          | chloroform                    | 5                                                | 4000             | 17.2           | –                                                         |
|         |          | toluene                       | 3                                                | 600              | 18.9           | –                                                         |
|         |          | chlorobenzene                 | 4                                                | 500              | 19.8           | –                                                         |
| S7, 9   | α-NPD    | vac.                          | –                                                | –                | 64.2           | 120                                                       |
|         |          | chloroform                    | 10                                               | 1000             | 67.7           | 120                                                       |
|         | TPT1     | vac.                          | –                                                | –                | 106.1          | 170                                                       |
|         | TSBF     | chloroform                    | 30                                               | 5000             | 115.4          | 170                                                       |
|         |          | vac.                          | –                                                | –                | 103.4          | 250                                                       |
| S8      | α-NPD    | chloroform                    | 30                                               | 3000             | 110.9          | 250                                                       |
|         | 2-TNATA  | chloroform                    | 10                                               | 1000             | 62.5           | 130                                                       |
| S10     | α-NPD    | chloroform                    | 15                                               | 1000             | 103.0, 111.0   | 130                                                       |
|         |          | vac.                          | –                                                | –                | 44.2           | 120                                                       |
| S11     | TPT1     | chloroform                    | 10                                               | 2000             | 43.2           | –                                                         |
|         |          | vac.                          | –                                                | –                | 53.6           | 170                                                       |
|         |          | chloroform                    | 10                                               | 1000             | 56.0           | –                                                         |
|         |          | TSBF                          | vac.                                             | –                | –              | 102.9                                                     |
|         | BDAVBi   | chloroform                    | 20                                               | 2000             | 105.0          | –                                                         |
|         |          | vac.                          | –                                                | –                | 35.5           | 130                                                       |
|         |          | chloroform                    | 5                                                | 1000             | 36.3           | –                                                         |
|         |          | vac.                          | –                                                | –                | 106.1          | 170                                                       |
| S12     | TPT1     | chloroform                    | 30                                               | 5000             | 115.4          | –                                                         |
|         |          | TSBF                          | vac.                                             | –                | –              | 103.4                                                     |
|         | BDAVBi   | chloroform                    | 30                                               | 3000             | 114.7          | –                                                         |
|         |          | vac.                          | –                                                | –                | 96.9           | 130                                                       |
| S13     | TPT1     | chloroform                    | 15                                               | 1000             | 101.7          | –                                                         |
|         |          | chloroform                    | 10–20                                            | 1000–7000        | 27.7–148.0     | –                                                         |
|         |          | toluene                       | 10–20                                            | 1000–7000        | 19.0–98.7      | –                                                         |
| S14     | 2-TNATA  | vac.                          | –                                                | –                | 53.6           | 170                                                       |
|         |          | chloroform                    | 15                                               | 1000-7000        | 41.9–105.5     | 170                                                       |
|         |          | toluene                       | 15                                               | 1000-7000        | 27.8–62.5      | 170                                                       |
|         |          | chlorobenzene                 | 30                                               | 1000             | 103.8          | –                                                         |
| S15     | 2-TNATA  | toluene                       | 15                                               | 600              | 104.3          | –                                                         |
|         |          | chlorobenzene                 | 30                                               | 1000             | 109.4          | –                                                         |
|         |          | <i>o</i> -dichlorobenzene     | 40                                               | 600              | 100.8          | –                                                         |
|         |          | chloroform                    | 10                                               | 5000             | 35.1           | –                                                         |
| S16, 17 | TPD      | toluene                       | 10                                               | 1500             | 39.7           | –                                                         |
|         |          | chlorobenzene                 | 10                                               | 1000             | 35.4           | –                                                         |
|         |          | vac. (0.2 Å s <sup>-1</sup> ) | –                                                | –                | 94.5           | 100                                                       |
| S16     | TPT1     | vac. (2 Å s <sup>-1</sup> )   | –                                                | –                | 100.3          | 100                                                       |
|         |          | vac. (20 Å s <sup>-1</sup> )  | –                                                | –                | 100.5          | 100                                                       |
|         |          | vac. (0.2 Å s <sup>-1</sup> ) | –                                                | –                | 98.5           | 170                                                       |
| S18     | TPD      | vac. (2 Å s <sup>-1</sup> )   | –                                                | –                | 104.1          | 170                                                       |
|         |          | vac. (20 Å s <sup>-1</sup> )  | –                                                | –                | 99.8           | 170                                                       |
|         |          | vac.                          | –                                                | –                | 49.0           | 100                                                       |
| S19     | TPD      | vac.                          | –                                                | –                | 46.5           | 100                                                       |
|         |          | chloroform                    | 10                                               | 3000             | 45.9           | 100                                                       |
|         |          | α-NPD                         | vac.                                             | –                | –              | 35.1                                                      |
|         |          | chloroform                    | 10                                               | 3000             | 39.1           | 120                                                       |

<sup>a</sup> The vacuum-deposited films were fabricated at a deposition rate of 2 Å s<sup>-1</sup> unless otherwise indicated.

<sup>b</sup> The temperatures at which the as-prepared films were annealed for 30 min to induce film transitions.

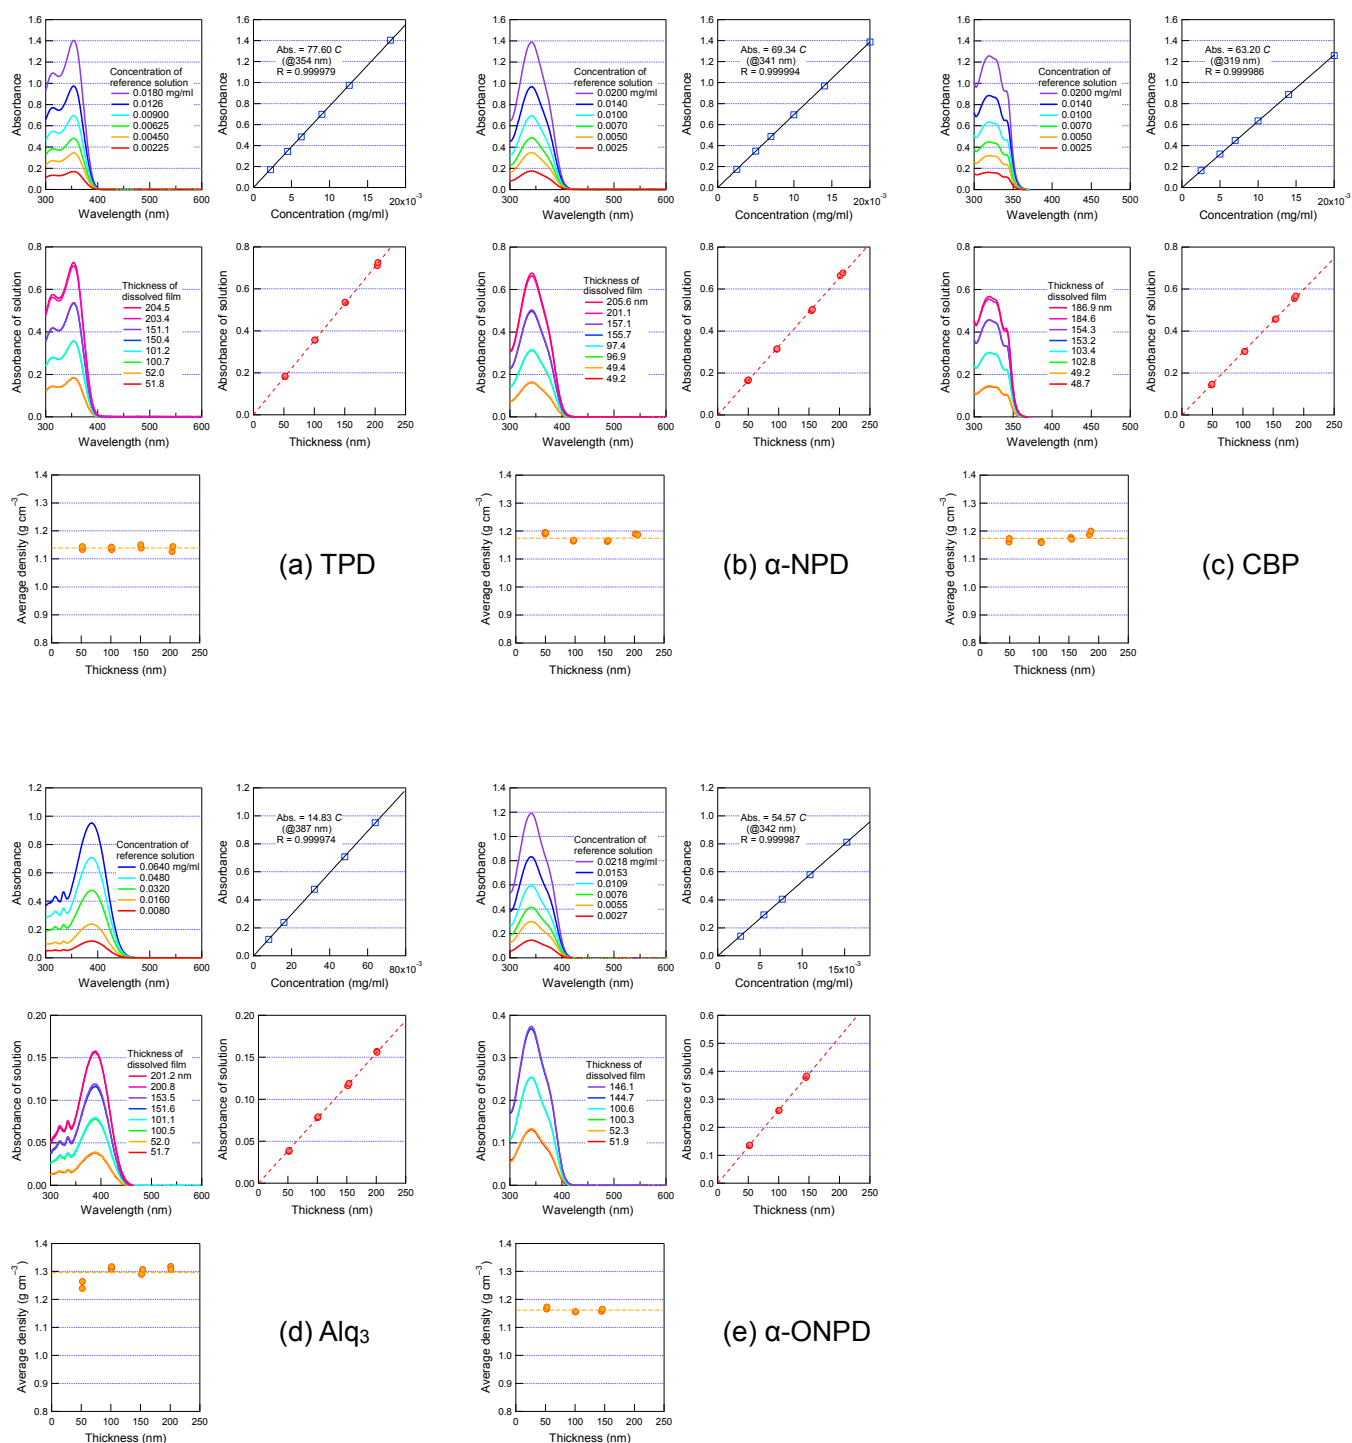

**Fig. S1(a)–(e)** UV-vis absorption spectra of reference solutions and solutions of dissolved vacuum-deposited films of (a) TPD, (b)  $\alpha$ -NPD, (c) CBP, (d) Alq<sub>3</sub>, and (e)  $\alpha$ -ONPD. Each material has five figures. For each, the upper left shows the absorption spectra of the reference solutions, and the upper right shows the calibration line. The central left shows the absorption spectra of the solutions of the dissolved films, and the central right shows the dependence of the absorbance on film thickness. The lower left shows the density of films with different thicknesses.

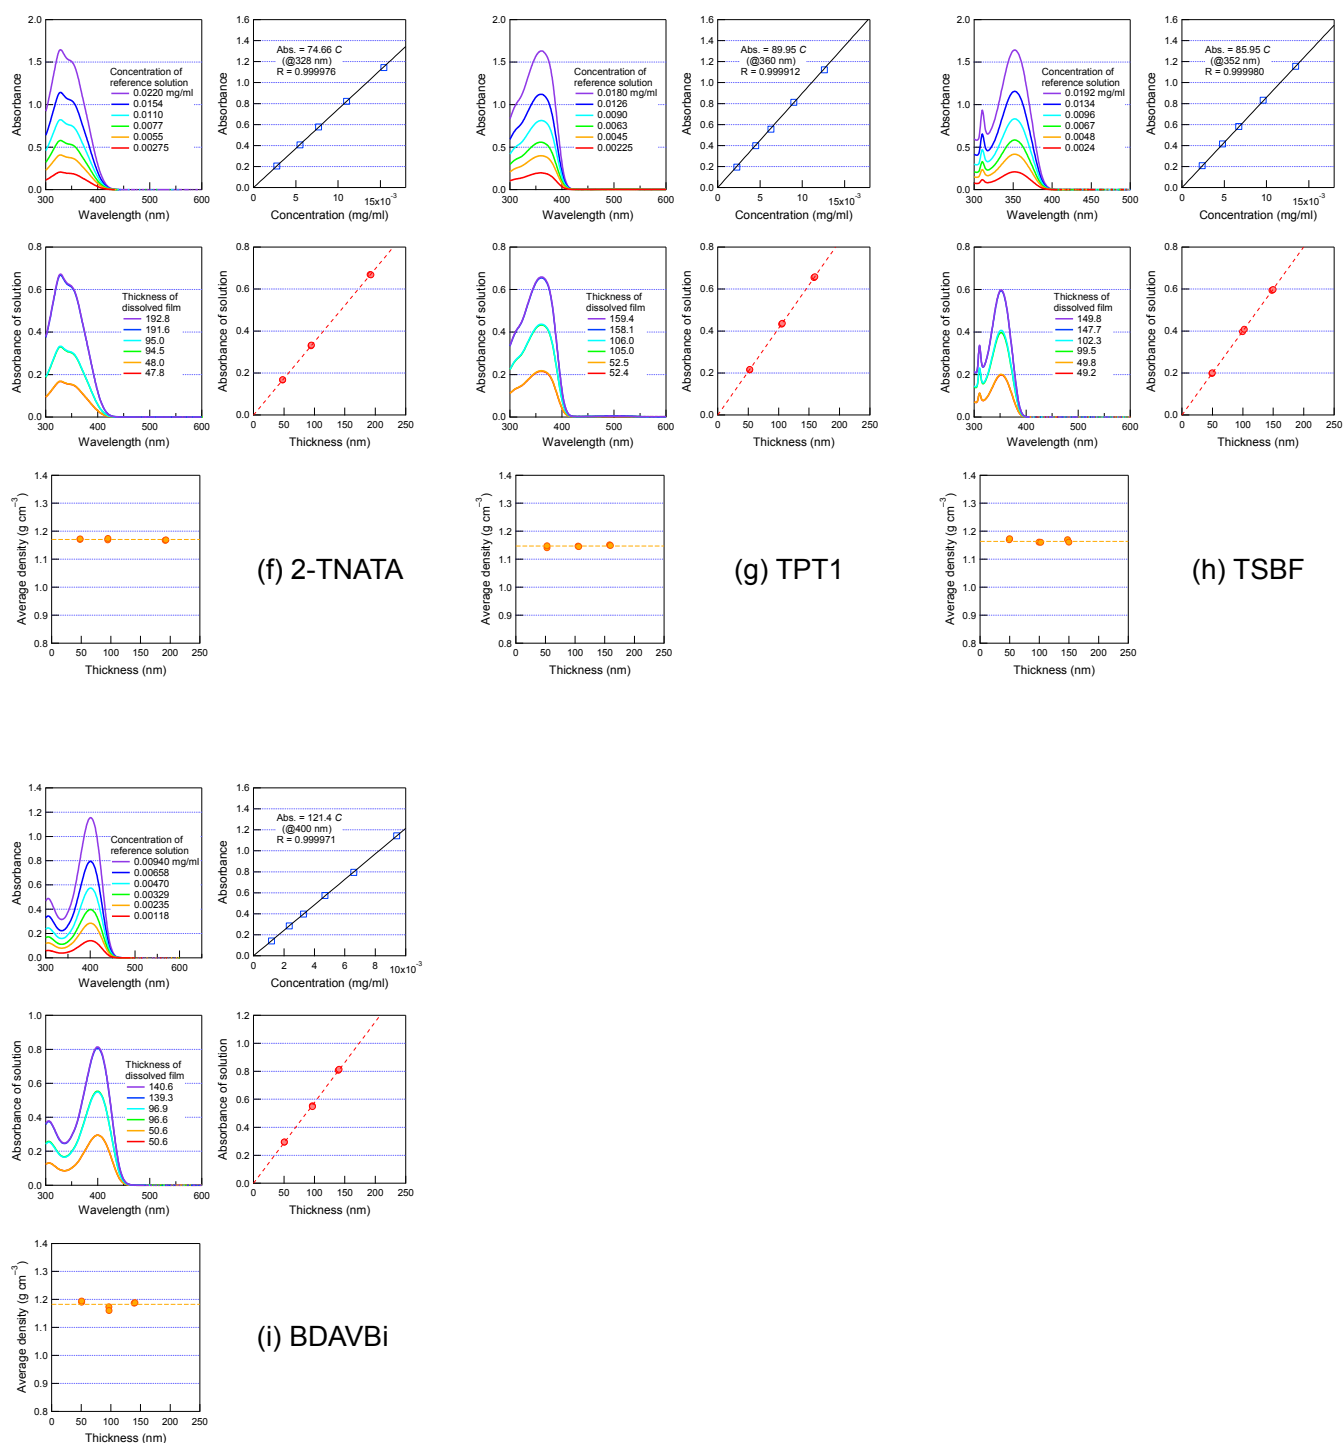

**Fig. S1(f)–(i)** UV-vis absorption spectra of reference solutions and solutions of dissolved vacuum-deposited films of (f) 2-TNATA, (g) TPT1, (h) TSBF, and (i) BDAVBi. Each material has five figures. For each, the upper left shows the absorption spectra of the reference solutions, and the upper right shows the calibration line. The central left shows the absorption spectra of the solutions of the dissolved films, and the central right shows the dependence of the absorbance on film thickness. The lower left shows the density of films with different thicknesses.

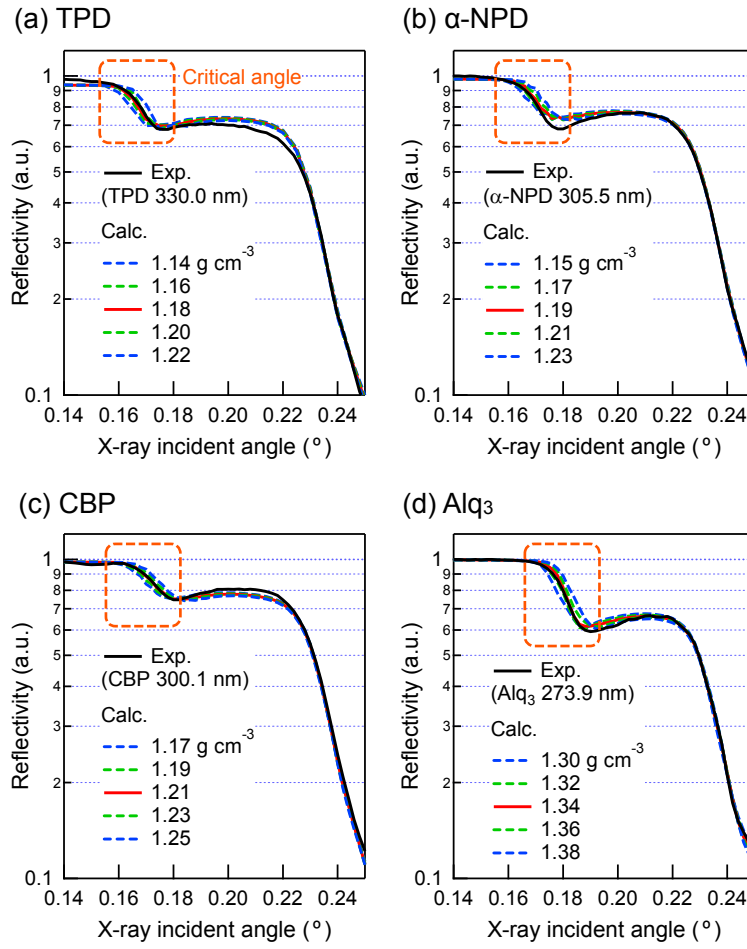

**Fig. S2** XRR patterns of vacuum-deposited films of (a) TPD, (b) α-NPD, (c) CBP, and (d) Alq<sub>3</sub> with a thickness of ~300 nm. The theoretical curves for the density within an error of  $\pm 0.04 \text{ g cm}^{-3}$  are also shown. These results indicate that our estimations with an error of  $\pm 0.04 \text{ g cm}^{-3}$  are reliable.

(a)  $\alpha$ -NPD

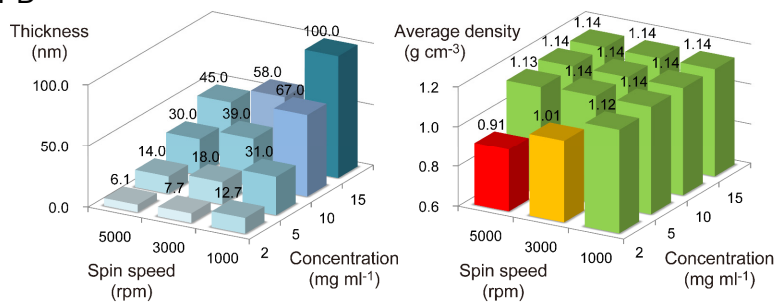

(b) CBP

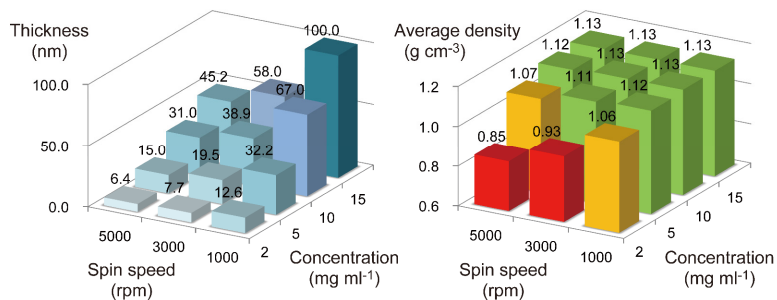

(c) Alq<sub>3</sub>

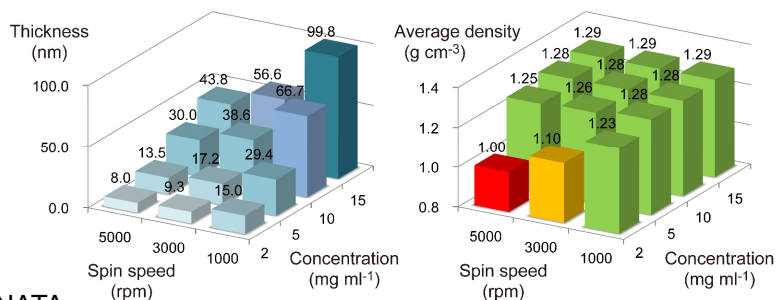

(d) 2-TNATA

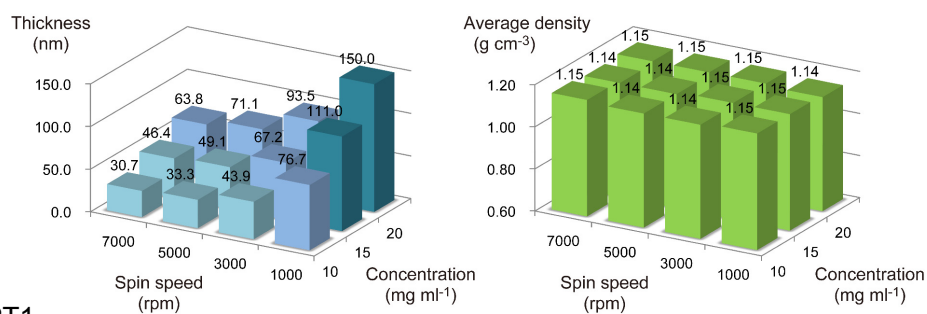

(e) TPT1

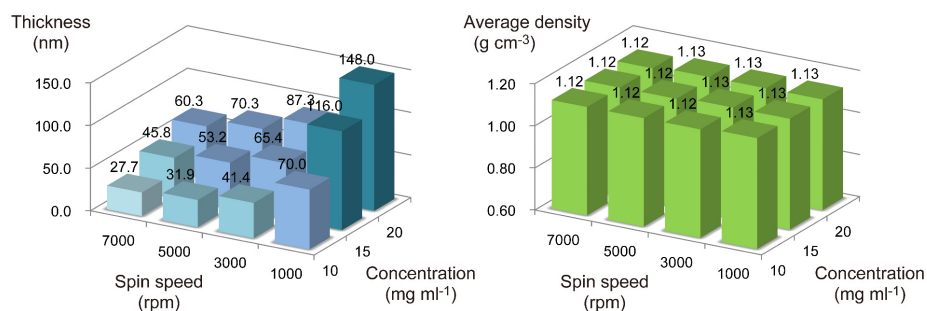

**Fig. S3** Thicknesses and film densities of spin-coated films of (a)  $\alpha$ -NPD, (b) CBP, (c) Alq<sub>3</sub>, (d) 2-TNATA, and (e) TPT1 fabricated using chloroform as the solvent with different spin speeds and solution concentrations.

(a) Toluene

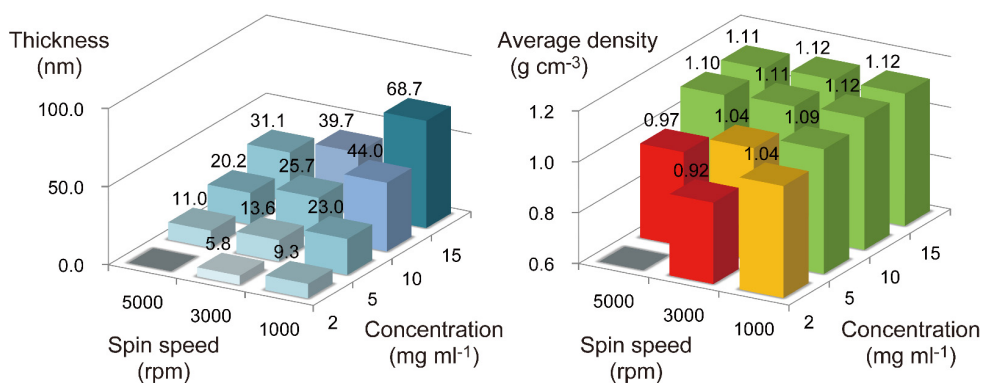

(b) Chlorobenzene

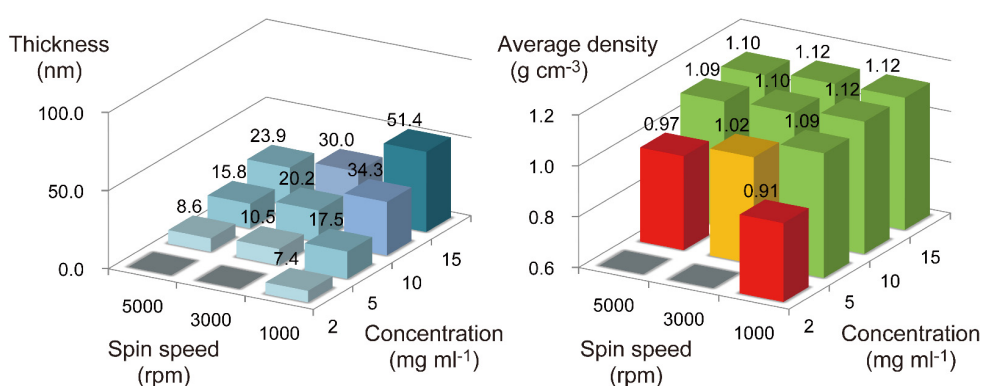

(c) *o*-Dichlorobenzene

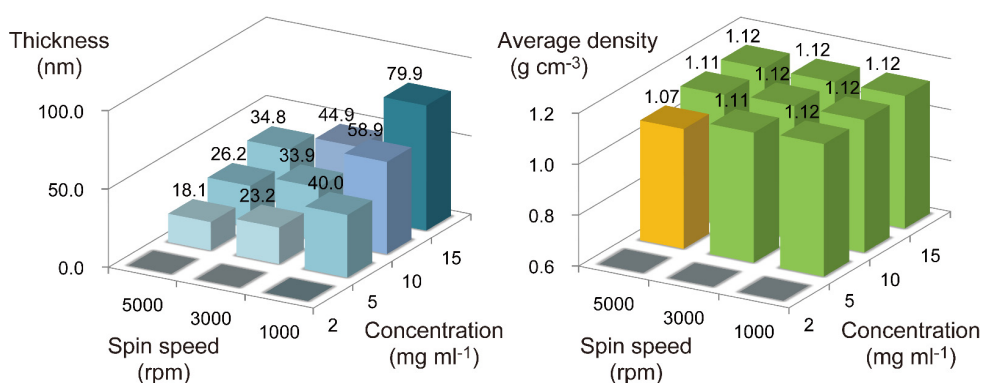

**Fig. S4** Thicknesses and film densities of spin-coated TPD films fabricated using (a) toluene, (b) chlorobenzene, and (c) *o*-dichlorobenzene as the solvent with different spin speeds and solution concentrations. These results show that the converged values for density are independent of the type of solvent.



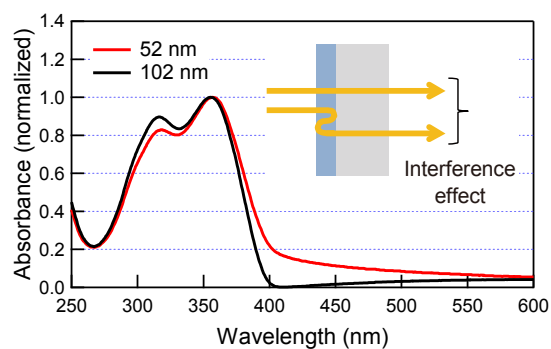

**Fig. S5** Normalized absorption spectra of vacuum-deposited TPD films with thicknesses of 52.3 and 102.2 nm. Although the only difference between the two films is the thickness, the spectral shapes obtained by measurements using a spectrophotometer are different because the film thickness influences the interference effect.

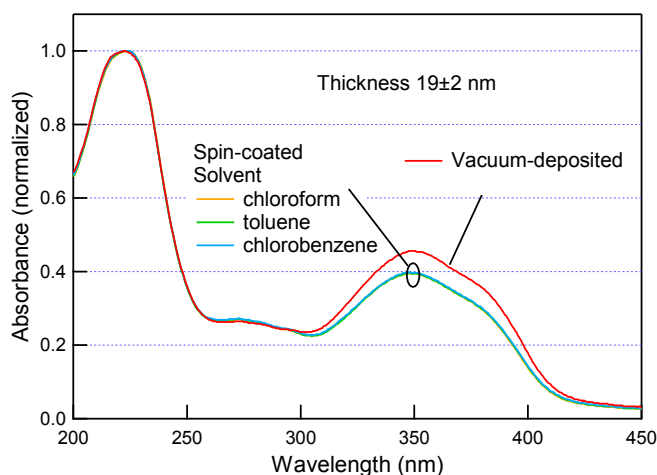

**Fig. S6** Normalized absorption spectra of spin-coated  $\alpha$ -NPD films fabricated using three different solvents and vacuum-deposited  $\alpha$ -NPD films. All films had approximately the same thickness of  $19 \pm 2$  nm: 17.2 nm (chloroform), 18.9 nm (toluene), 19.8 nm (chlorobenzene), and 17.6 nm (vacuum-deposited film).

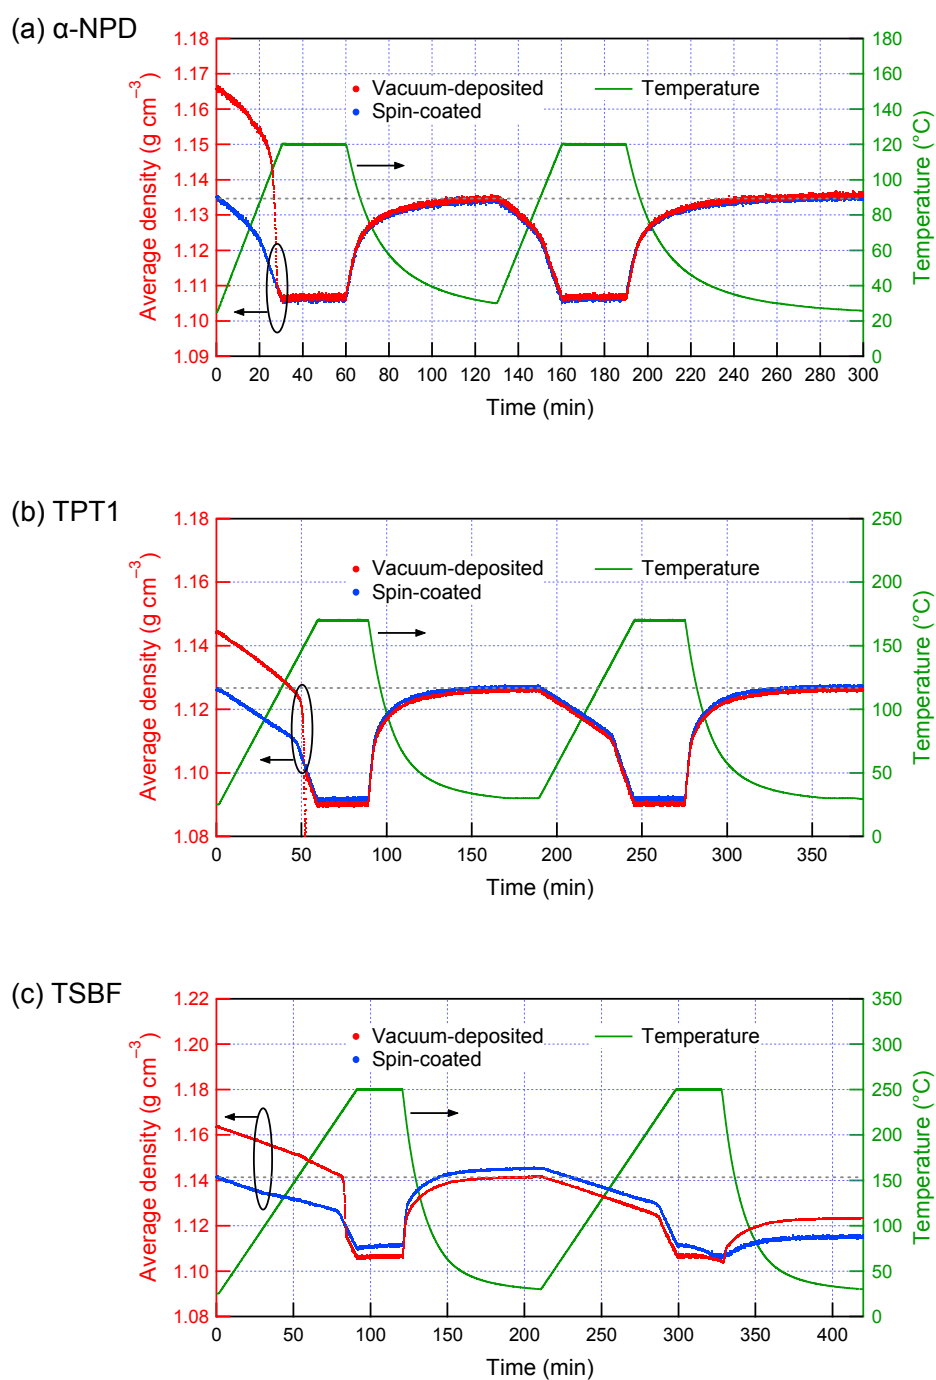

**Fig. S7** Changes of the densities of vacuum-deposited (red) and spin-coated (blue) films of (a)  $\alpha$ -NPD (with a thickness of  $\sim 65$  nm), (b) TPT1 ( $\sim 110$  nm), and (c) TSBF ( $\sim 105$  nm) during heating-cooling cycles. The temperature during the cycles is also shown (green). The gray dotted horizontal lines show the identical densities of the transition-experienced vacuum-deposited film and the spin-coated film at room temperature. Although the density at room temperature of the TSBF films seem to decrease after the second cycle, this is caused by crystallization, which increases the roughness of the film surface and lowers apparent density.

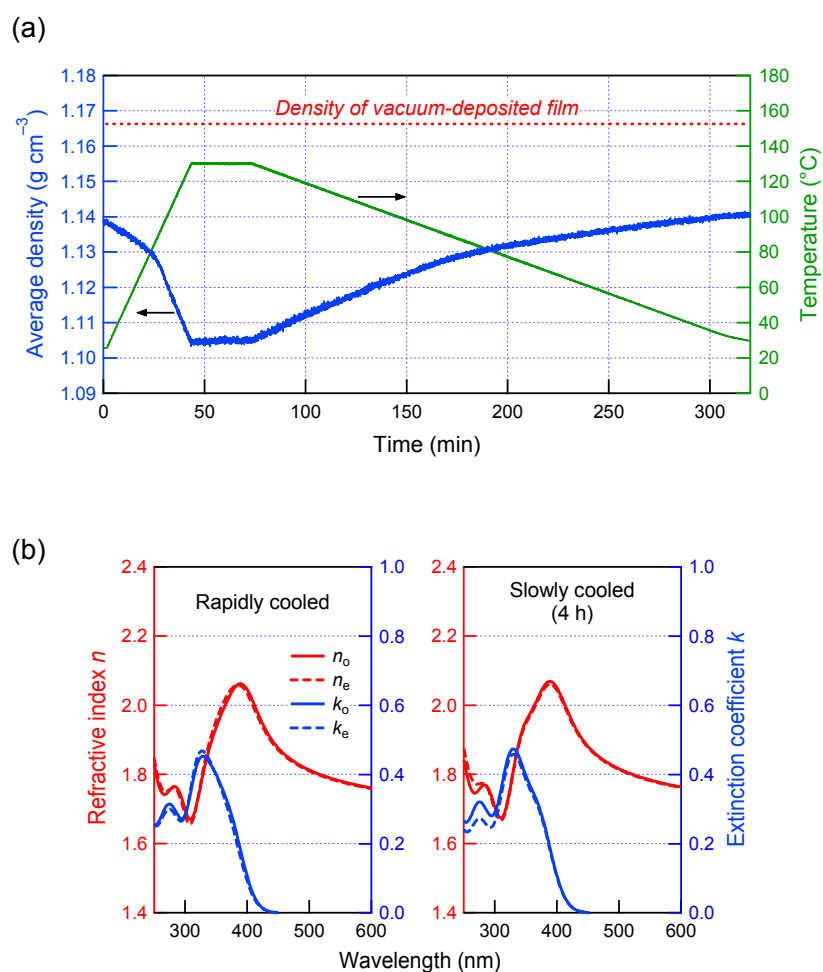

**Fig. S8** Effects of slow cooling over 4 h on (a) the density of a spin-coated  $\alpha$ -NPD film after transition and (b) the molecular orientation in spin-coated 2-TNATA films after transition. In (a), the change of density of the spin-coated  $\alpha$ -NPD films in the slow cooling process is shown. The films were 62.5-nm thick. The green line shows the temperature during the cycles with a very slow cooling process that took 4 h. The red dotted horizontal line shows the density of the vacuum-deposited  $\alpha$ -NPD film at room temperature. The results reveal that the slow cooling process cannot compensate the difference between the densities of the vacuum-deposited and spin-coated films. In (b), the anisotropic optical constants of transition-experienced 2-TNATA films that have been cooled rapidly and slowly are shown. Two spin-coated 2-TNATA films with original thicknesses of 103.0 and 111.0 nm were annealed at 130 °C for 30 min, and then one was rapidly cooled on a metal plate at room temperature, while the other was slowly cooled over 4 h using a temperature-control stage. The red solid and broken lines show the refractive indices in the horizontal and vertical directions ( $n_o$  and  $n_e$ ), respectively, and the blue solid and broken lines show the extinction coefficients in the horizontal and vertical directions ( $k_o$  and  $k_e$ ), respectively. The result of no significant difference indicates that the slow cooling process cannot change the random molecular orientation in the spin-coated film.

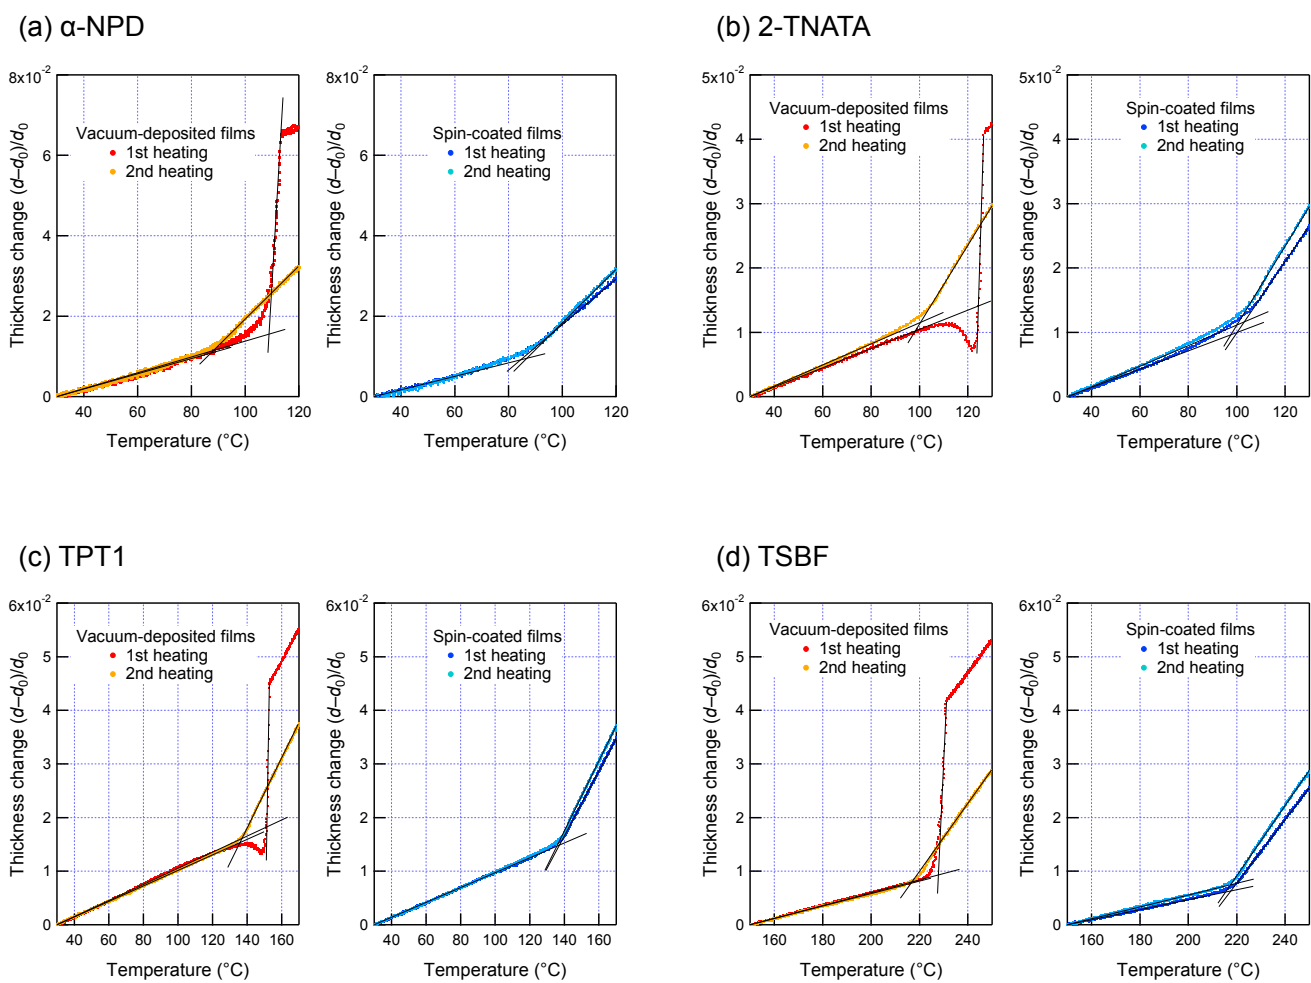

**Fig. S9** Thickness changes of vacuum-deposited and spin-coated films of (a)  $\alpha$ -NPD, (b) 2-TNATA, (c) TPT1, and (d) TSBF during the first and second heating processes. The slopes are the thermal expansion coefficients, and the cross points of the slope lines (black lines) show the transition temperatures.

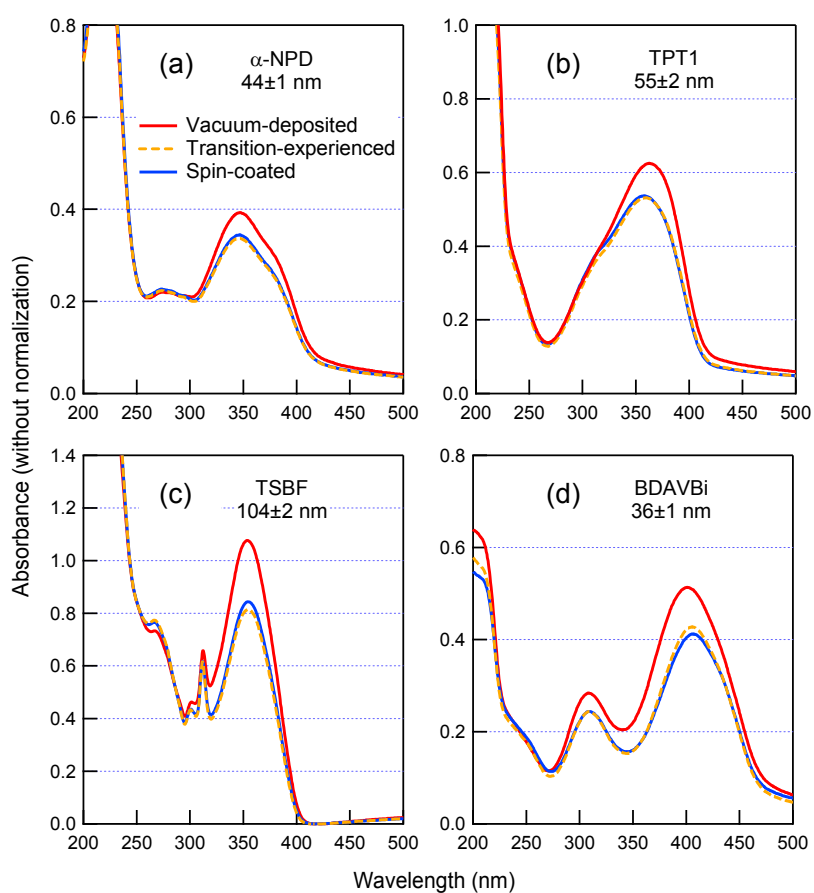

**Fig. S10** Absorption spectra without normalization of as-prepared vacuum-deposited films, transition-experienced vacuum-deposited films, and spin-coated films of (a)  $\alpha$ -NPD, (b) TPT1, (c) TSBF, and (d) BDAVBi. The original thicknesses of the vacuum-deposited and spin-coated films were approximately the same (see Table S1 for details). The results show that the absorbance of the vacuum-deposited films decreases after the transition because of the randomization of molecular orientation, and also that the absorption spectra of the transition-experienced and spin-coated films are identical.

(a) TPT1

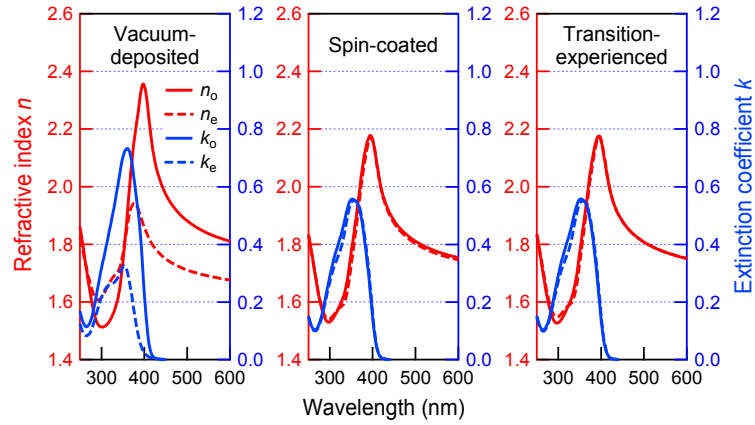

(b) TSBF

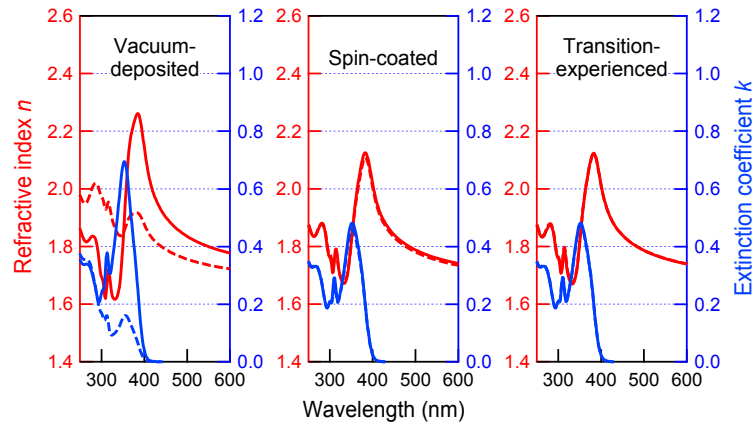

(c) BDAVBi

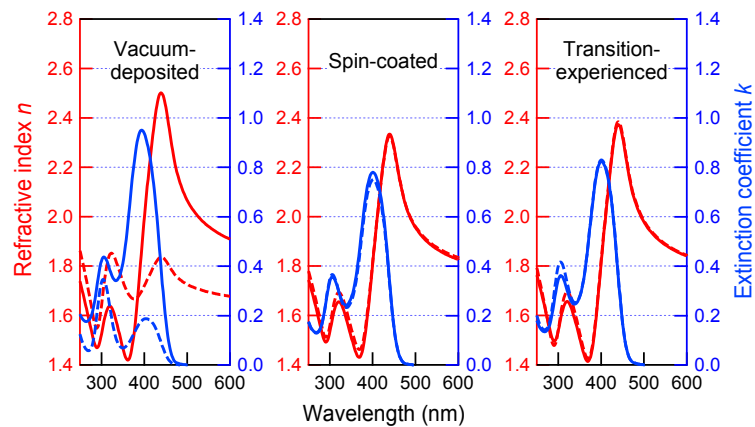

**Fig. S11** Anisotropic optical constants of as-prepared vacuum-deposited films, spin-coated films, and transition-experienced vacuum-deposited films of (a) TPT1, (b) TSBF, and (c) BDAVBi. The thicknesses of the films were 96–116 nm (see Table S1 for details). The red solid and broken lines show the refractive indices in the horizontal and vertical direction ( $n_o$  and  $n_e$ ), respectively, and the blue solid and broken lines show the extinction coefficients in the horizontal and vertical direction ( $k_o$  and  $k_e$ ), respectively. The results reveal a high degree of horizontal orientation in the vacuum-deposited films and the similarity of the spin-coated and transition-experienced films with random orientation.

(a) TPT1/chloroform

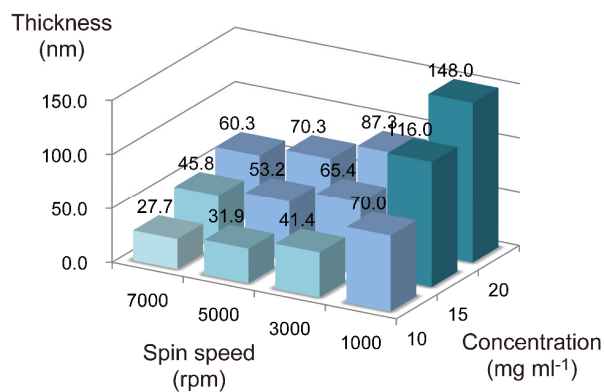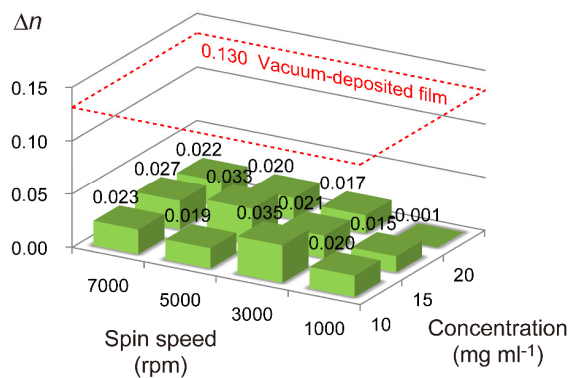

(b) TPT1/toluene

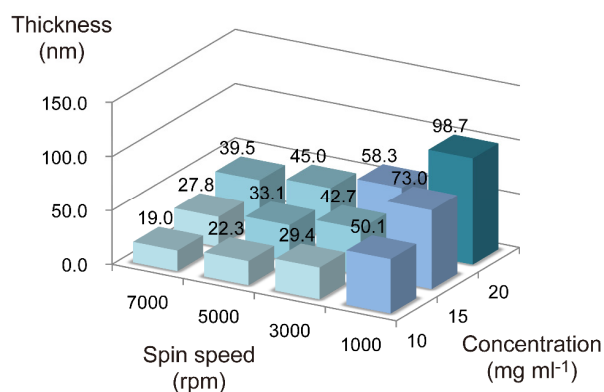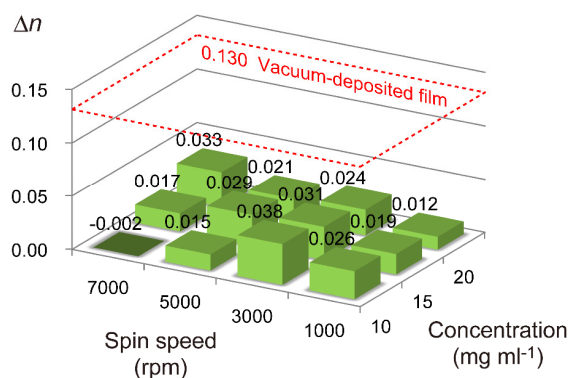

**Fig. S12** Thicknesses and birefringences of spin-coated TPT1 films fabricated using (a) chloroform and (b) toluene as the solvent under with different spin speeds and solution concentrations. The birefringence of the vacuum-deposited TPT1 film is also shown (red dotted line). The results show that the molecular orientation in the spin-coated films is nearly random over the wide range of spin-coating conditions investigated, and the degree of horizontal molecular orientation in the spin-coated films is much lower than that in the vacuum-deposited films.

(a) TPT1/chloroform

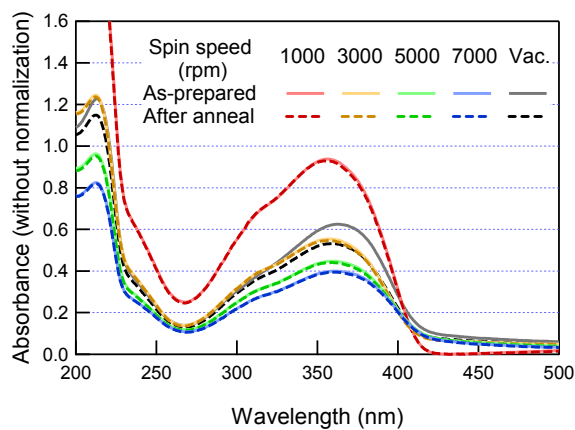

(b) TPT1/toluene

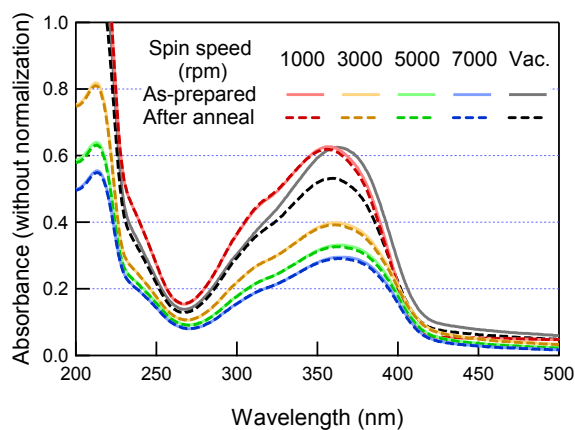

**Fig. S13** Absorption spectra without normalization of as-prepared and transition-experienced spin-coated TPT1 films fabricated using (a) chloroform and (b) toluene as the solvent with a solution concentration of  $15 \text{ mg ml}^{-1}$  and different spin speeds. Absorption spectra of as-prepared and transition-experienced vacuum-deposited TPT1 films with a thickness of  $\sim 50 \text{ nm}$  are also shown.



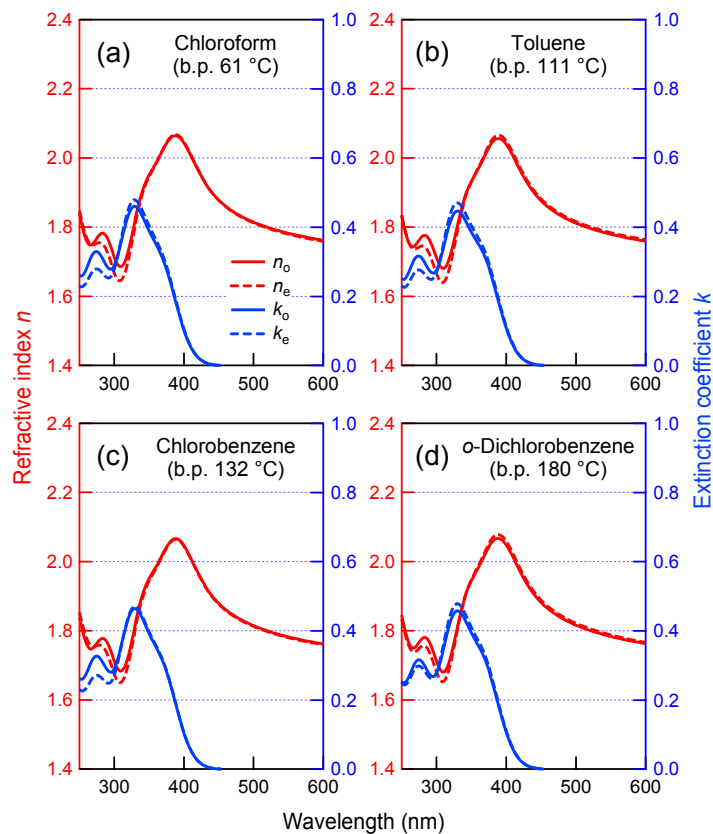

**Fig. S14** Anisotropic optical constants of spin-coated 2-TNATA films fabricated using (a) chloroform, (b) toluene, (c) chlorobenzene, and (d) *o*-dichlorobenzene as the solvent. The thicknesses of the films were 100–110 nm (see Table S1 for details). The red solid and broken lines show the refractive indices in the horizontal and vertical directions ( $n_o$  and  $n_e$ ), respectively, and the blue solid and broken lines show the extinction coefficients in the horizontal and vertical directions ( $k_o$  and  $k_e$ ), respectively. The results reveal that there is no significant dependence of optical constants on the type of solvent.

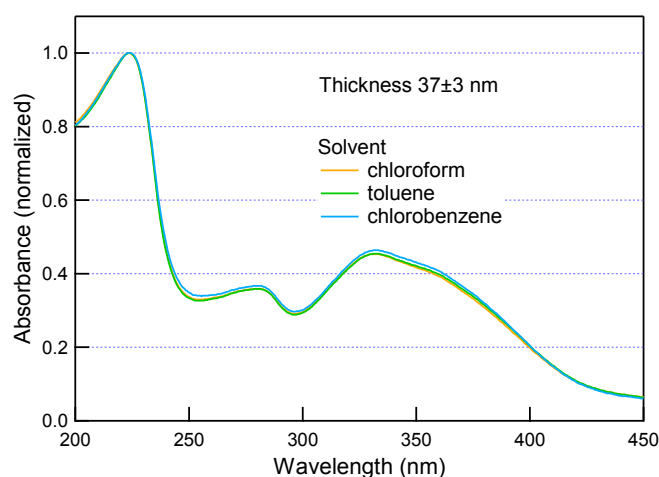

**Fig. S15** Normalized absorption spectra of spin-coated 2-TNATA films fabricated using three different solvents. All films had approximately the same thickness of  $37\pm 3$  nm: 35.1 nm (chloroform), 39.7 nm (toluene), and 35.4 nm (chlorobenzene). The results show that there was no significant dependence of the absorption spectra on the type of solvent.

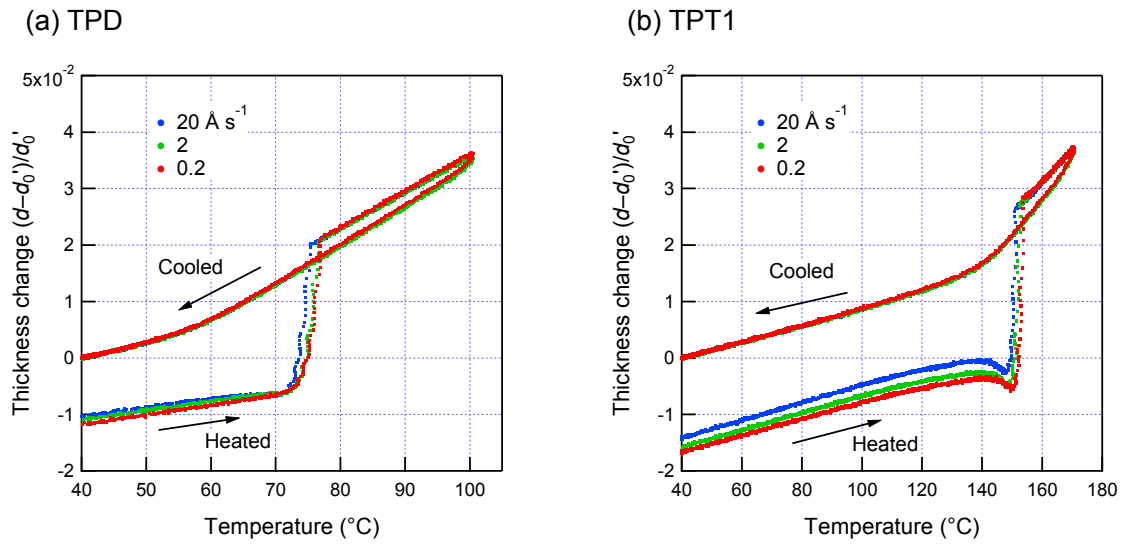

**Fig. S16** Thickness changes of vacuum-deposited (a) TPD and (b) TPT1 films fabricated at different deposition rates of 0.2, 2, and 20 Å/s during a heating and cooling cycle. To compare the densities of the as-prepared films, the thicknesses at 40 °C after cooling  $d_0'$  are used as the standards for normalization.

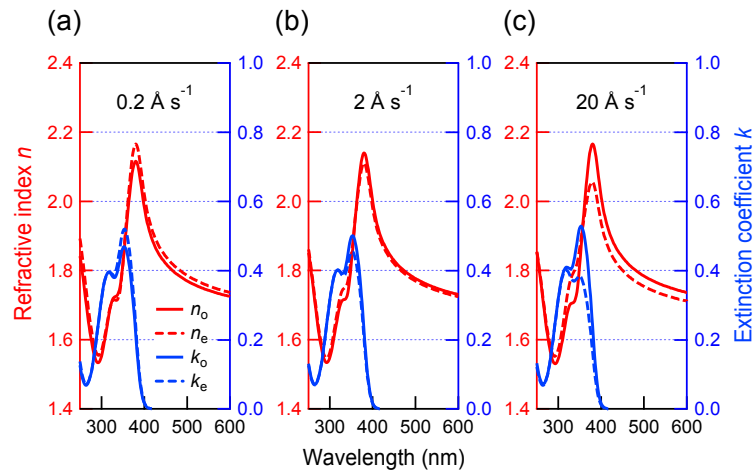

**Fig. S17** Anisotropic optical constants of vacuum-deposited TPD films with a thickness of  $\sim 100$  nm fabricated at deposition rates of (a) 0.2, (b) 2, and (c) 20 Å/s. The red solid and broken lines show the refractive indices in the horizontal and vertical directions ( $n_o$  and  $n_e$ ), respectively, and the blue solid and broken lines show the extinction coefficients in the horizontal and vertical directions ( $k_o$  and  $k_e$ ), respectively.

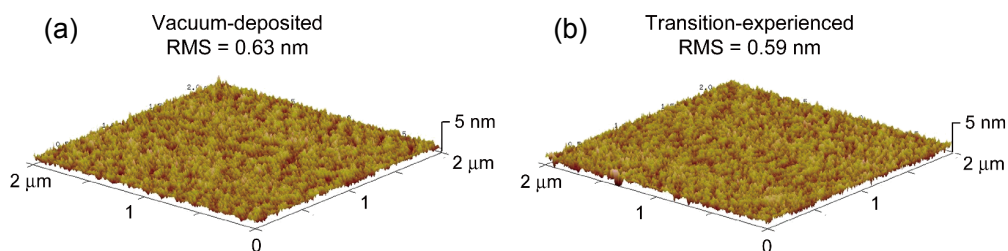

**Fig. S18** Atomic force microscope images of the surface of a vacuum-deposited TPD film (a) before and (b) after annealing at 100 °C for 30 min. The sample film with a thickness of 49.0 nm was deposited on a Si substrate. These images show that the surface roughness of vacuum-deposited TPD films does not become large even after the transition induced by heating.

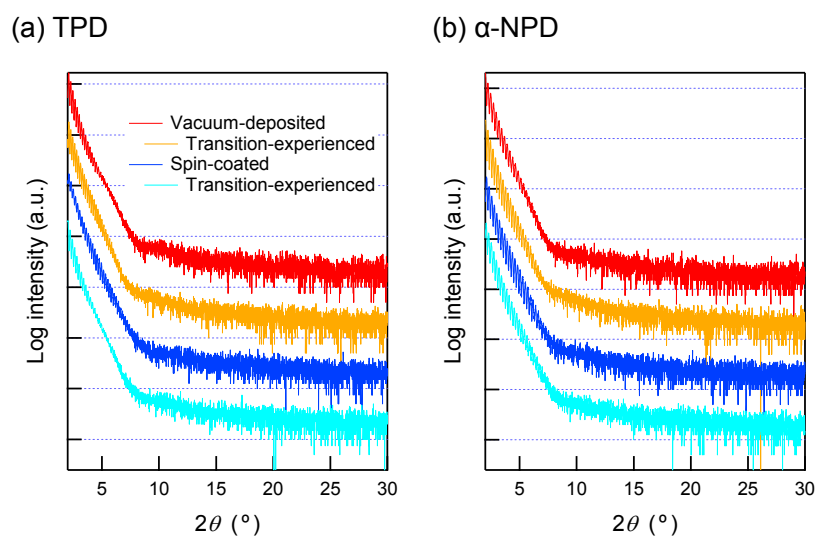

**Fig. S19** Out-of-plane X-ray diffraction (XRD) patterns of vacuum-deposited and spin-coated TPD and α-NPD films on a Si substrate. The XRD patterns of the films after transition were also measured. The thickness of the TPD films was ~46 nm, and that of the α-NPD films was ~37 nm. There is no apparent diffraction peak in the patterns, showing that all of these films remain amorphous without crystallization even after the transition induced by heating.
